# Supplementary material for: Beyond the staple motif: a new order at the thiolate–gold interface
Source: Royal Society of Chemistry journal article supplement (doi:10.1039/c6nr07709a), 2016-01-01
Supplement: c6nr07709a1.pdf [file c6nr07709a1.pdf]

*Electronic Supplementary Information for:*

## **Beyond the staple motif: new order at the thiolate-gold interface**

Guoxiang Hu,<sup>†</sup> Rongchao Jin,<sup>‡</sup> and De-en Jiang<sup>\*,†</sup>

<sup>†</sup>Department of Chemistry, University of California, Riverside, California 92521, US

<sup>‡</sup>Department of Chemistry, Carnegie Mellon University, Pittsburgh, Pennsylvania 15213, US

\*To whom correspondence should be addressed. E-mail: [djiang@ucr.edu](mailto:djiang@ucr.edu).

Table S1 Binding energies (eV) of methylthiolate at different adsorption sites on Au(111) with different layers of slab in a (4 × 4) lateral cell. The initial angle between the surface normal and S-C bond is 30°.

| <b>Slab thickness</b> | <b>4 layers</b>   | <b>5 layers</b>   | <b>6 layers</b>   |
|-----------------------|-------------------|-------------------|-------------------|
| <b>top</b>            | -1.64             | -1.57             | -1.67             |
| <b>bridge</b>         | -1.99             | -1.96             | -2.08             |
| <b>fcc</b>            | -1.94             | -1.91             | -2.02             |
| <b>hcp</b>            | Relaxed to bridge | Relaxed to bridge | Relaxed to bridge |

Table S2 Binding energies (eV) of methylthiolate at different adsorption sites on Au(100) with different layers of slab in a  $(4 \times 4)$  lateral cell.

| <b>Slab thickness</b>       | <b>4 layers</b>   | <b>5 layers</b>   | <b>6 layers</b>   |
|-----------------------------|-------------------|-------------------|-------------------|
| <b>top</b>                  | Relaxed to bridge | Relaxed to bridge | Relaxed to bridge |
| <b>bridge</b>               | -2.41             | -2.34             | -2.36             |
| <b>square 4-fold hollow</b> | -2.18             | -2.08             | -2.19             |

Table S3 Binding energies (eV) of methylthiolate at different adsorption sites on Au(110) with different layers of slab in a  $(3 \times 4)$  lateral cell.

| <b>Slab thickness</b>            | <b>4 layers</b>            | <b>5 layers</b>            | <b>6 layers</b>            |
|----------------------------------|----------------------------|----------------------------|----------------------------|
| <b>top</b>                       | Relaxed to short<br>bridge | Relaxed to short<br>bridge | Relaxed to short<br>bridge |
| <b>long bridge</b>               | -2.39                      | -2.31                      | -2.36                      |
| <b>short bridge</b>              | -2.59                      | -2.47                      | -2.56                      |
| <b>pseudo 3-fold hollow</b>      | Relaxed to short<br>bridge | Relaxed to short<br>bridge | Relaxed to short<br>bridge |
| <b>rectangular 4-fold hollow</b> | Relaxed to short<br>bridge | Relaxed to short<br>bridge | Relaxed to short<br>bridge |
